# Supplementary material for: Increased risk of aseptic loosening for 43,525 rotating-platform vs. fixed-bearing total knee replacements: A Norwegian–Australian registry study, 2003–2014
Source: PubMed Central journal article supplement — Acta Orthop. 2017 Sep 20;88(6):649–56. doi: 10.1080/17453674.2017.1378533 (PMC5694810; doi:10.1080/17453674.2017.1378533), 2017-09-20
Supplement: IORT_A_1378533_SM4928.pdf [file IORT_A_1378533_SM4928.pdf]

## Supplementary data

Table A. For Norwegian data the proportional hazards assumption was not valid when comparing non-keeled mobile bearing with fixed bearing. Consequently, the risk estimates of aseptic loosening were calculated for various time periods

| Time after operation | Relative risk estimate (95%CI) |
|----------------------|--------------------------------|
| 0–3 months           | 0.5 (0.1–2.5)                  |
| 3–12 months          | 2.8 (1.4–5.4)                  |
| 0–12 months          | 2.0 (1.1–3.6)                  |
| 0–2 years            | 4.0 (2.6–6.1)                  |
| 0–3 years            | 5.2 (3.6–7.5)                  |
| 0–10 years           | 6.2 (4.5–8.4)                  |
| 1–10 years           | 9.0 (6.1–13.3)                 |
| 2–10 years           | 9.7 (6.0–15.6)                 |
| 3–10 years           | 9.2 (5.0–16.9)                 |

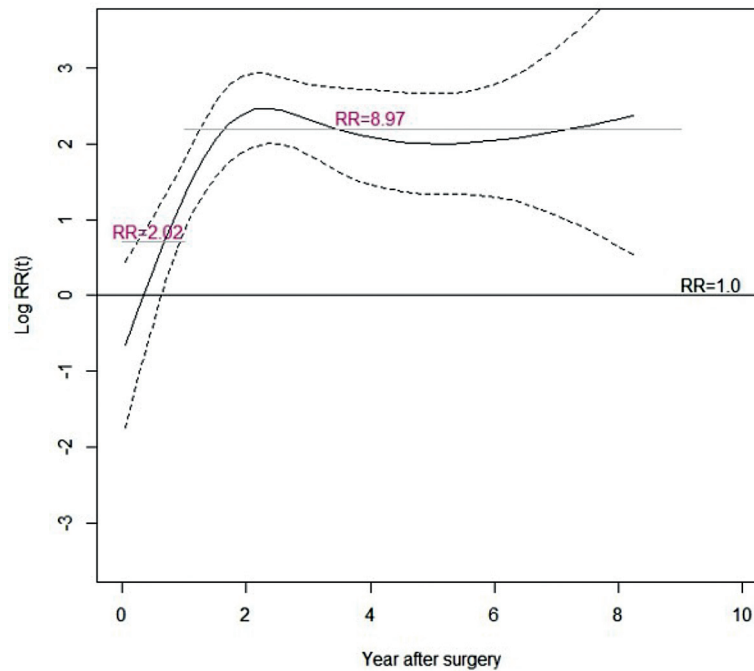

Figure A. The graph shows relative risk estimates of aseptic loosening calculated by the Cox regression method, during years 0–10 after surgery, comparing non-keeled mobile-bearing with fixed-bearing TKRs in Norway. The hazards are not proportional during the entire time period. The first 3 months have a negative RR, and a lower risk for the mobile bearing TKRs (than for the fixed TKRs). However, only 9 revisions are registered during these 3 months, hence the corresponding RR is not reliable due to low numbers.
